# Supplementary material for: Infection with Cryptosporidium parvum Affects Secondary Sexual Characteristics of Male Mice by Altering the Pheromone Content in Preputial Gland
Source: MDPI journal article supplement (doi:10.3390/ani13040756), 2023-02-19
Supplement: s1 [file s1]

Supplementary File S1

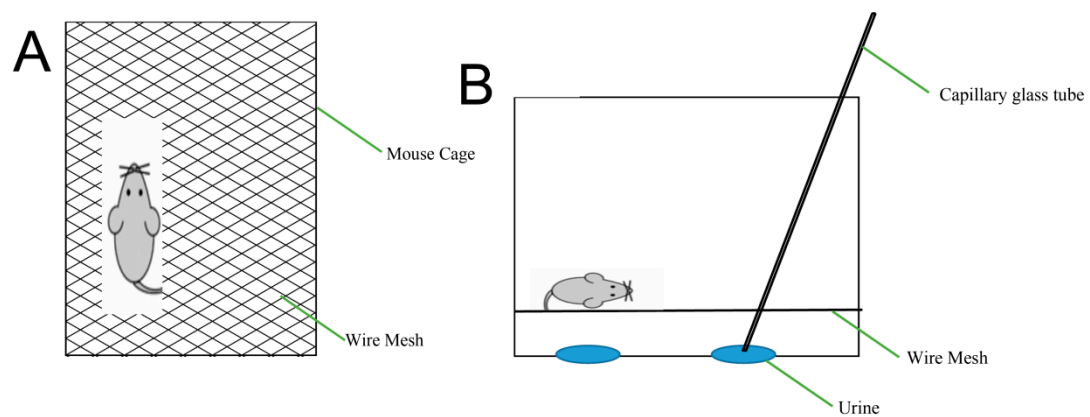

**Figure S1** Schematic diagram of the device used for urine collection. (A) Mouse was placed in a clean cage, the cage was covered with a wire mesh ( $0.5 \times 0.5$  cm) about 2 cm from the bottom. (B) After the mice urinated, the urine was aspirated with a disposable capillary glass tube and transferred to a centrifuge tube. When mice urinated, the urine contaminated by feces was discarded in the urine collection procedure.

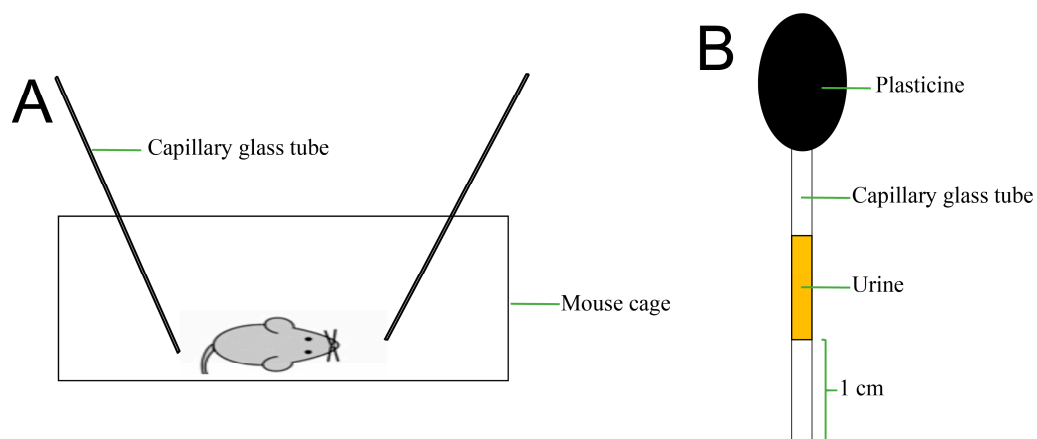

**Figure S2** Schematic diagram of the device used for behavioral test. (A) In the behavioral test, female mice was placed in a clean cage, capillary glass tubes with urine samples from infection group and control group were presented to the mouse through the cage cover. (B) The capillary glass tube carried 2  $\mu$ L of urine, and one end of the capillary was sealed with plasticine. The liquid bottom was about 1 cm away from the capillary tip.
